# Supplementary material
Source: MDPI journal article supplement (https://www.mdpi.com/2218-0532/89/3/33)

**Supplementary 1a.** Mathematical modelling for DMH transdermal patches F1–F5 (EC–PVP).

| Modelling        | Formulae | Parameters                   | R <sup>2</sup> adjusted | AIC    | MSC     |
|------------------|----------|------------------------------|-------------------------|--------|---------|
| Zero-Order       | F1       | k0=6.630                     | 0.1788                  | 84.35  | -0.76   |
|                  | F2       | k0=8.939                     | 0.4145                  | 88.09  | -0.29   |
|                  | F3       | k0=11.250                    | -0.5013                 | 100.77 | -1.81   |
|                  | F4       | k0=10.536                    | -1.1067                 | 102.05 | -2.67   |
|                  | F5       | k0=10.978                    | -1.0667                 | 102.88 | -2.58   |
| First-Order      | F1       | k1=0.097                     | 0.4636                  | 79.66  | -0.34   |
|                  | F2       | k1=0.159                     | 0.7518                  | 78.65  | 0.56    |
|                  | F3       | k1=0.328                     | 0.4861                  | 88.98  | -0.74   |
|                  | F4       | k1=0.274                     | -0.0552                 | 94.45  | -1.98   |
|                  | F5       | k1=0.324                     | 0.0447                  | 94.39  | -1.81   |
| Higuchi          | F1       | kH=17.861                    | 0.8522                  | 65.48  | 0.94    |
|                  | F2       | kH=23.891                    | 0.9356                  | 63.81  | 1.90    |
|                  | F3       | kH=30.901                    | 0.6141                  | 85.83  | -0.45   |
|                  | F4       | kH=29.206                    | 0.2845                  | 90.18  | -1.59   |
|                  | F5       | kH=30.419                    | 0.3001                  | 90.97  | -1.50   |
| Hixson Crowell   | F1       | kHC=0.029                    | 0.3804                  | 81.25  | -0.48   |
|                  | F2       | kHC=0.044                    | 0.6685                  | 81.83  | 0.27    |
|                  | F3       | kHC=0.083                    | 0.2813                  | 92.67  | -1.08   |
|                  | F4       | kHC=0.068                    | -0.3197                 | 96.91  | -2.20   |
|                  | F5       | kHC=0.078                    | -0.2311                 | 97.18  | -2.06   |
| Korsmeyer-Peppas | F1       | kKP=25.658<br><b>n=0.290</b> | <b>0.9640</b>           | 50.77  | 2.28    |
|                  | F2       | kKP=30.913<br><b>n=0.352</b> | <b>0.9831</b>           | 49.92  | 3.17    |
|                  | F3       | kKP=53.031<br><b>n=0.184</b> | <b>0.9907</b>           | 45.64  | 3.19    |
|                  | F4       | kKP=57.117<br><b>n=0.103</b> | <b>0.9862</b>           | 47.56  | 2.28    |
|                  | F5       | kKP=59.077<br><b>n=0.107</b> | <b>0.9781</b>           | 53.72  | 1.88    |
| Hopfenberg       | F1       | kHB=0.000<br>n=1370.731      | 0.4038                  | 81.66  | -0.52   |
|                  | F2       | kHB=0.000<br>n=2067.878      | 0.7241                  | 80.65  | 0.37    |
|                  | F3       | kHB=0.000<br>n=5320.112      | 0.4289                  | 90.98  | -0.9277 |
|                  | F4       | kHB=0.000                    | -0.1727                 | 96.45  | -2.1636 |

|                |    |                                   |               |         |       |
|----------------|----|-----------------------------------|---------------|---------|-------|
|                |    | n=3632.980                        |               |         |       |
|                | F5 | kHB=0.000<br>n=4936.651           | -0.0617       | 96.40   | -1.99 |
| Baker-Lonsdale | F1 | kBL=0.007                         | 0.8937        | 61.8571 | 1.27  |
|                | F2 | kBL=0.014                         | 0.9694        | 55.61   | 2.65  |
|                | F3 | kBL=0.029                         | 0.8163        | 77.66   | 0.28  |
|                | F4 | kBL=0.025                         | 0.5383        | 85.36   | -1.15 |
|                | F5 | kBL=0.029                         | 0.5667        | 85.70   | -1.02 |
| Makoid-Banakar | F1 | kMB=25.580<br>n=0.227<br>k=-0.018 | <b>0.9625</b> | 51.93   | 2.17  |
|                | F2 | kMB=30.950<br>n=0.321<br>k=-0.008 | <b>0.9816</b> | 51.60   | 3.01  |
|                | F3 | kMB=53.212<br>n=0.211<br>k=0.008  | <b>0.9904</b> | 46.74   | 3.09  |
|                | F4 | kMB=56.042<br>n=0.019<br>k=-0.026 | <b>0.9953</b> | 36.52   | 3.28  |
|                | F5 | kMB=58.028<br>n=0.031<br>k=-0.024 | <b>0.9840</b> | 50.93   | 2.13  |

R<sup>2</sup>: Correlation Coefficient; k: Rate Constant; AIC: Akaike Information Criterion; and MSC: Model Selection Criterion. Makoid-Banakar model is the most suitable since R<sup>2</sup> is the highest and nearest to 1 compared to other models. The Korsmeyer-Peppas release exponent (n) value is <0.5, indicating the Fickian diffusion mechanism for all the formulas.

**Supplementary 1b.** Mathematical modelling For DMH transdermal patches F1–F5 (ES–HPMC).

| Modelling (ES–HPMC) | Formulae | Parameters                   | R <sup>2</sup> adjusted | AIC   | MSC   |
|---------------------|----------|------------------------------|-------------------------|-------|-------|
| Zero–Order          | F1       | k0=9.234                     | 0.1930                  | 82.40 | -0.77 |
|                     | F2       | k0=11.573                    | -0.4798                 | 91.60 | -1.78 |
|                     | F3       | k0=12.660                    | -0.3973                 | 92.88 | -1.69 |
|                     | F4       | k0=13.305                    | -0.3857                 | 93.76 | -1.68 |
|                     | F5       | k0=13.926                    | -0.6508                 | 96.11 | -2.02 |
| First–Order         | F1       | k1=0.175                     | 0.6545                  | 73.92 | 0.07  |
|                     | F2       | k1=0.366                     | 0.5656                  | 79.34 | -0.56 |
|                     | F3       | k1=0.513                     | 0.6586                  | 78.78 | -0.28 |
|                     | F4       | k1=0.635                     | 0.7545                  | 76.45 | 0.04  |
|                     | F5       | k1=1.043                     | 0.8287                  | 73.45 | 0.24  |
| Higuchi             | F1       | kH=24.863                    | 0.8828                  | 63.11 | 1.15  |
|                     | F2       | kH=31.868                    | 0.6467                  | 77.27 | -0.35 |
|                     | F3       | kH=34.718                    | 0.6607                  | 78.72 | -0.27 |
|                     | F4       | kH=36.493                    | 0.6775                  | 79.18 | -0.22 |
|                     | F5       | kH=38.488                    | 0.5667                  | 82.73 | -0.68 |
| Hixson Crowell      | F1       | kHC=0.048                    | 0.5488                  | 76.59 | -0.19 |
|                     | F2       | kHC=0.097                    | 0.3983                  | 82.60 | -0.88 |
|                     | F3       | kHC=0.127                    | 0.5094                  | 82.41 | -0.64 |
|                     | F4       | kHC=0.139                    | 0.6215                  | 80.78 | -0.38 |
|                     | F5       | kHC=0.150                    | 0.6059                  | 81.78 | -0.59 |
| Korsmeyer–Peppas    | F1       | kKP=34.720<br><b>n=0.302</b> | <b>0.9839</b>           | 44.08 | 3.05  |
|                     | F2       | kKP=53.116<br><b>n=0.194</b> | <b>0.9977</b>           | 27.58 | 4.61  |
|                     | F3       | kKP=57.429<br><b>n=0.198</b> | <b>0.9842</b>           | 48.90 | 2.70  |
|                     | F4       | kKP=59.989<br><b>n=0.202</b> | <b>0.9941</b>           | 39.93 | 3.69  |
|                     | F5       | kKP=66.594<br><b>n=0.171</b> | <b>0.9979</b>           | 30.08 | 4.57  |
| Hopfenberg          | F1       | kHB=0<br>n=3545.648          | 0.6112                  | 75.92 | -0.12 |
|                     | F2       | kHB=0<br>n=3403.549          | 0.5111                  | 81.34 | -0.76 |
|                     | F3       | kHB=0<br>n=5201.056          | 0.6159                  | 80.79 | -0.48 |
|                     | F4       | kHB=0                        | 0.7238                  | 78.45 | -0.15 |

|                |    |                                   |               |       |      |
|----------------|----|-----------------------------------|---------------|-------|------|
|                |    | n=6167.137                        |               |       |      |
|                | F5 | kHB=0<br>n=5645.851               | 0.8072        | 75.45 | 0.04 |
| Baker-Lonsdale | F1 | kBL=0.015                         | 0.9395        | 56.50 | 1.81 |
|                | F2 | kBL=0.032                         | 0.8497        | 68.73 | 0.49 |
|                | F3 | kBL=0.043                         | 0.8655        | 69.47 | 0.64 |
|                | F4 | kBL=0.050                         | 0.9024        | 67.23 | 0.96 |
|                | F5 | kBL=0.050                         | 0.8460        | 72.38 | 0.34 |
| Makoid-Banakar | F1 | kMB=34.807<br>n=0.210<br>k=-0.024 | <b>0.9879</b> | 41.89 | 3.27 |
|                | F2 | kMB=53.107<br>n=0.192<br>k=0.000  | <b>0.9974</b> | 29.56 | 4.41 |
|                | F3 | kMB=56.843<br>n=0.120<br>k=-0.023 | <b>0.9893</b> | 45.67 | 3.02 |
|                | F4 | kMB=59.618<br>n=0.143<br>k=-0.017 | <b>0.9973</b> | 32.96 | 4.39 |
|                | F5 | kMB=66.407<br>n=0.151<br>k=-0.006 | <b>0.9981</b> | 29.72 | 4.61 |

R<sup>2</sup>: Correlation Coefficient; k: Rate Constant; AIC: Akaike Information Criterion; and MSC: Model Selection Criterion. Makoid-Banakar model is the most suitable since R<sup>2</sup> is the highest and nearest to 1 compared to other models. The Korsmeyer-Peppas release exponent (n) value is <0.5, indicating the Fickian diffusion mechanism for all the formulas.

**Supplementary 2a.** Goodness of fit (GOF) evaluations based on correlation of residual versus time indicating that the makoid-banakar model is the most suitable model to explain DMH dissolution data from EC-PVP containing patches.

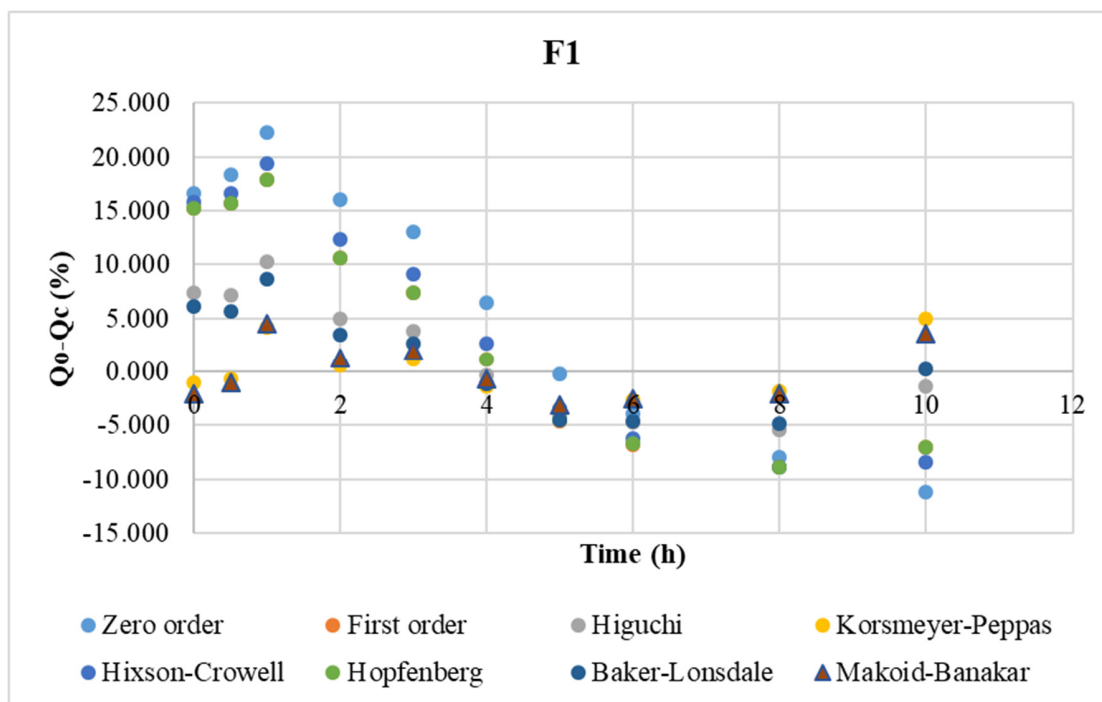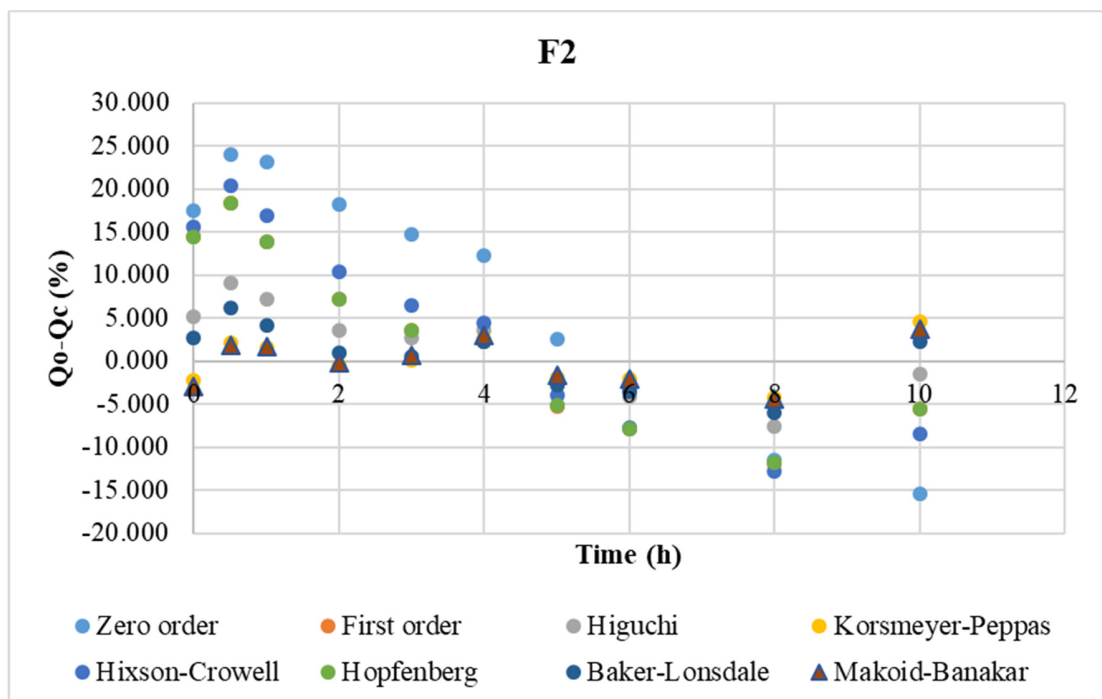

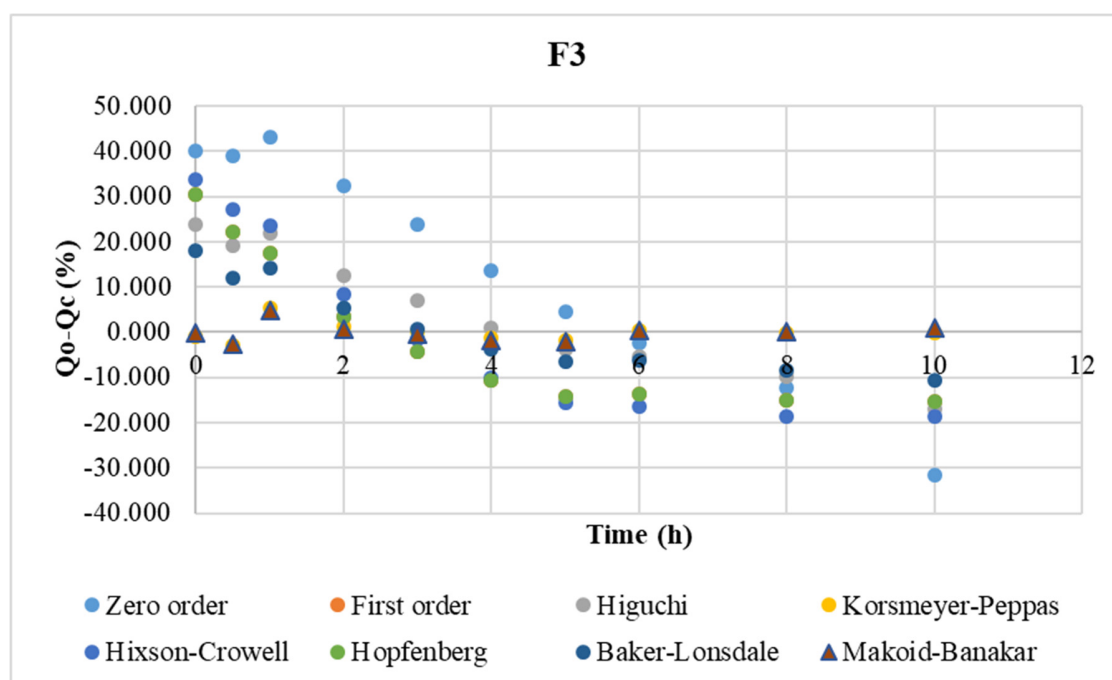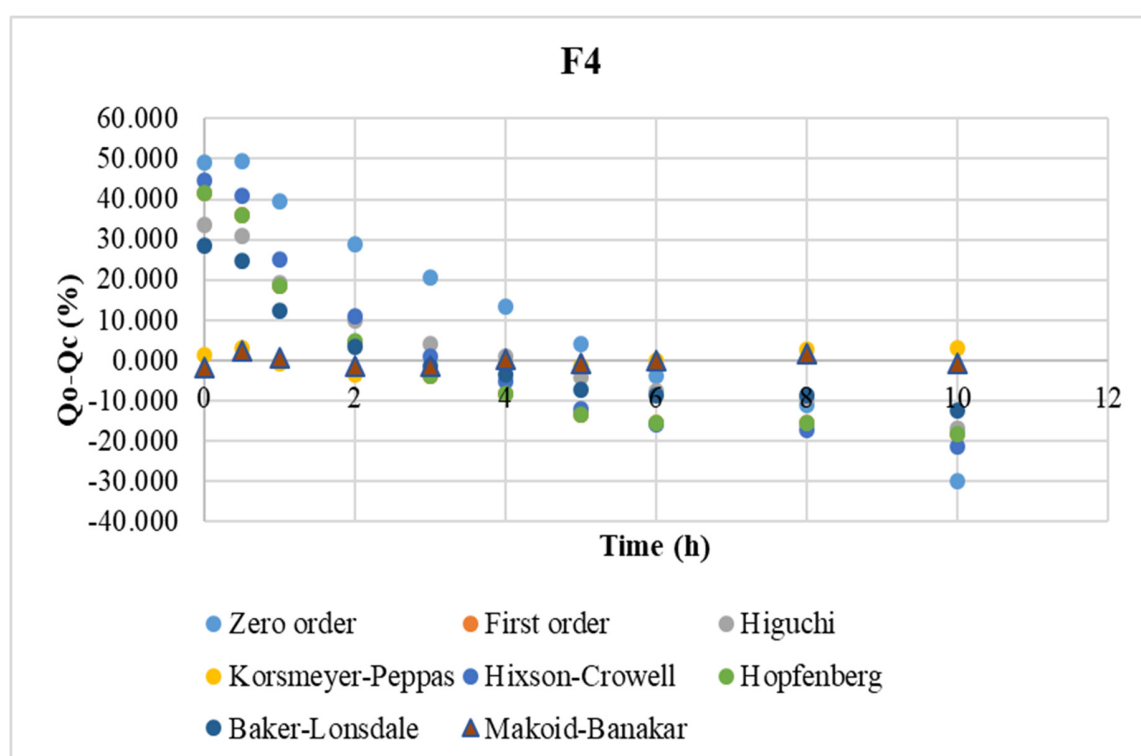

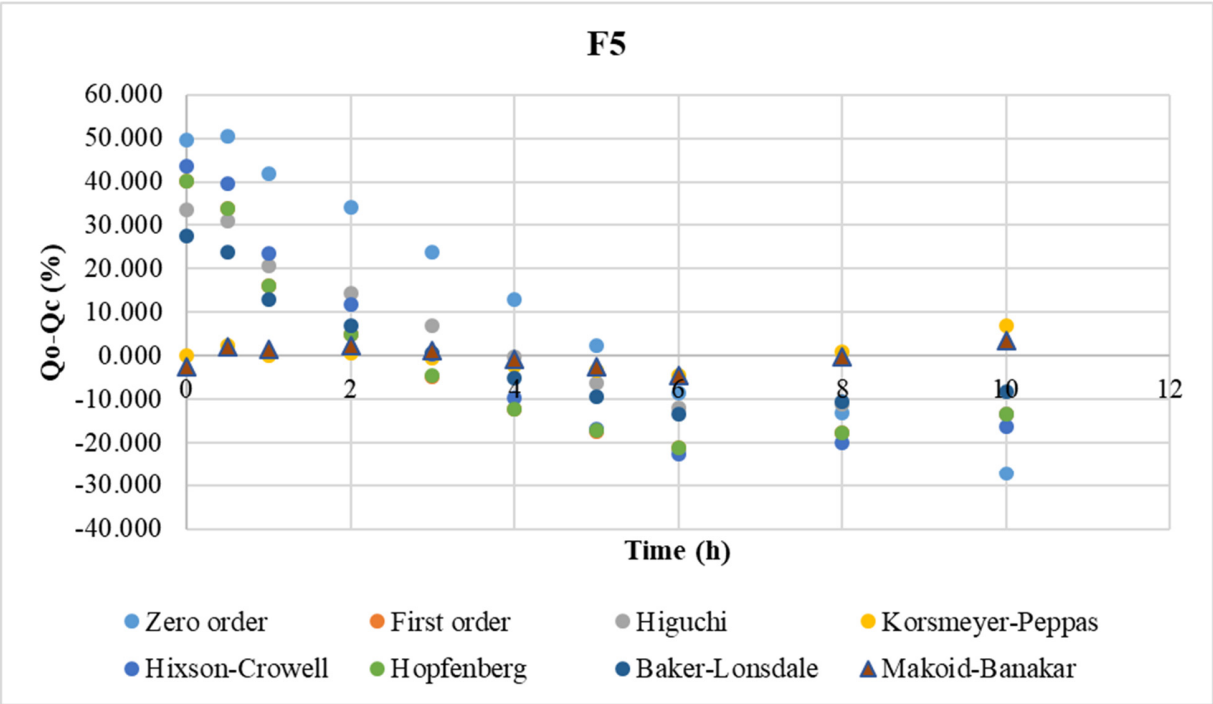

**Supplementary 2b.** Goodness of fit (GOF) evaluations based on correlation of residual versus time indicating that the makoid-banakar model is the most suitable model to explain DMH dissolution data from ES-HPMC containing patches.

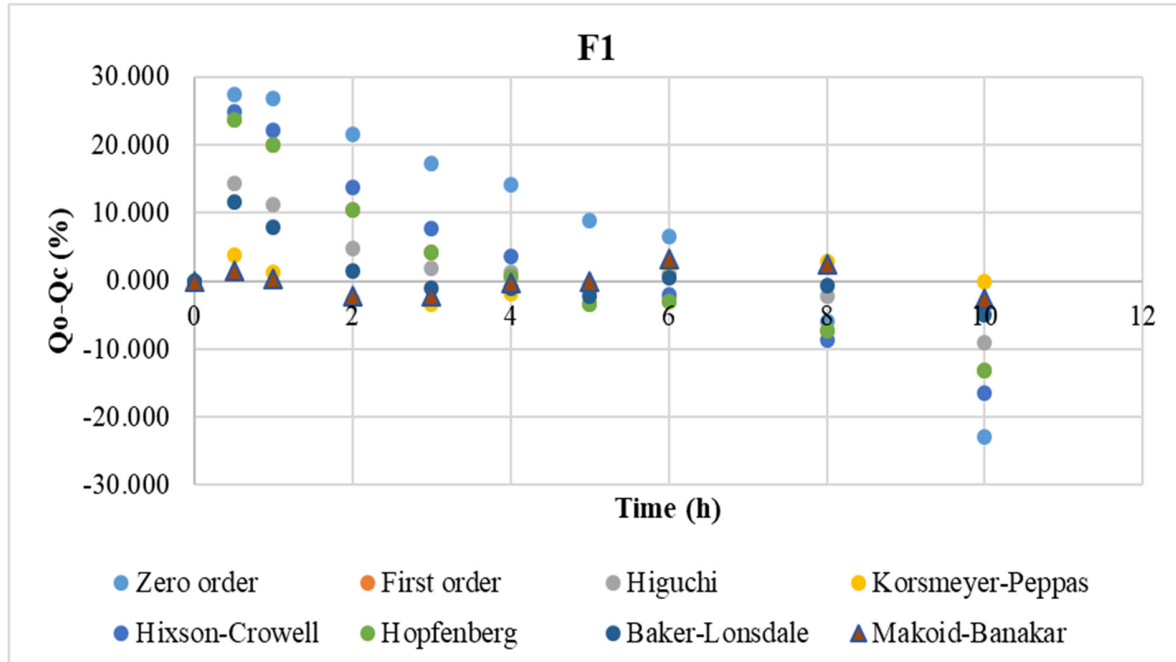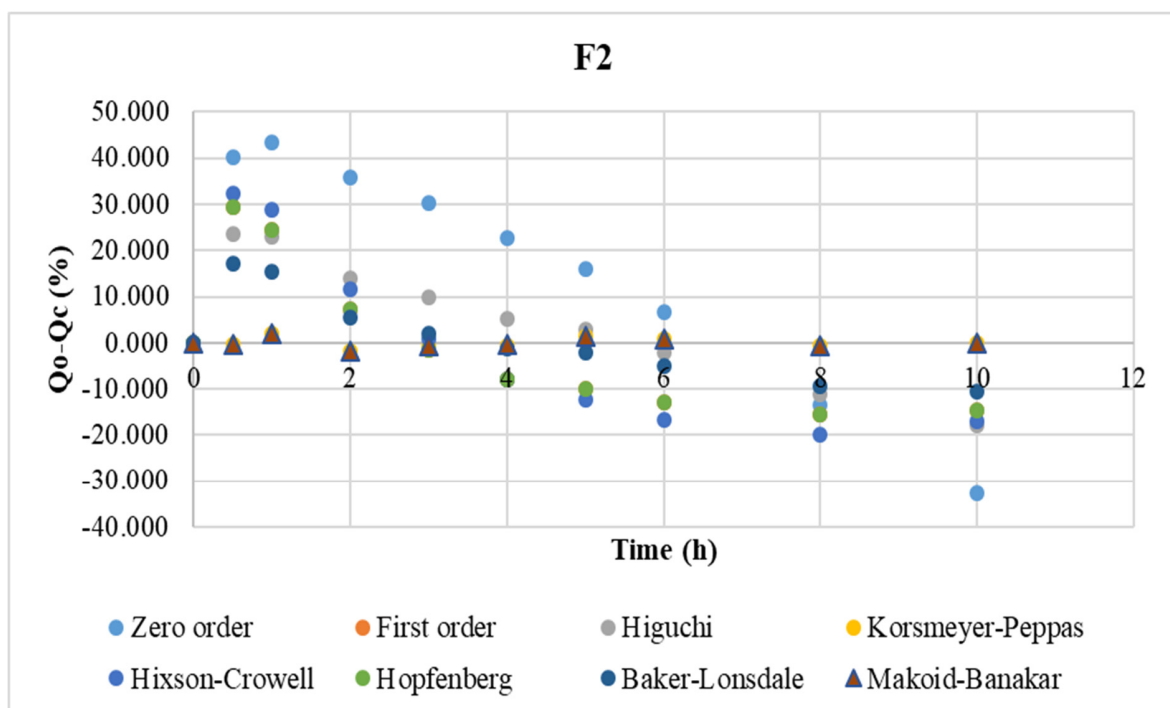



**F3**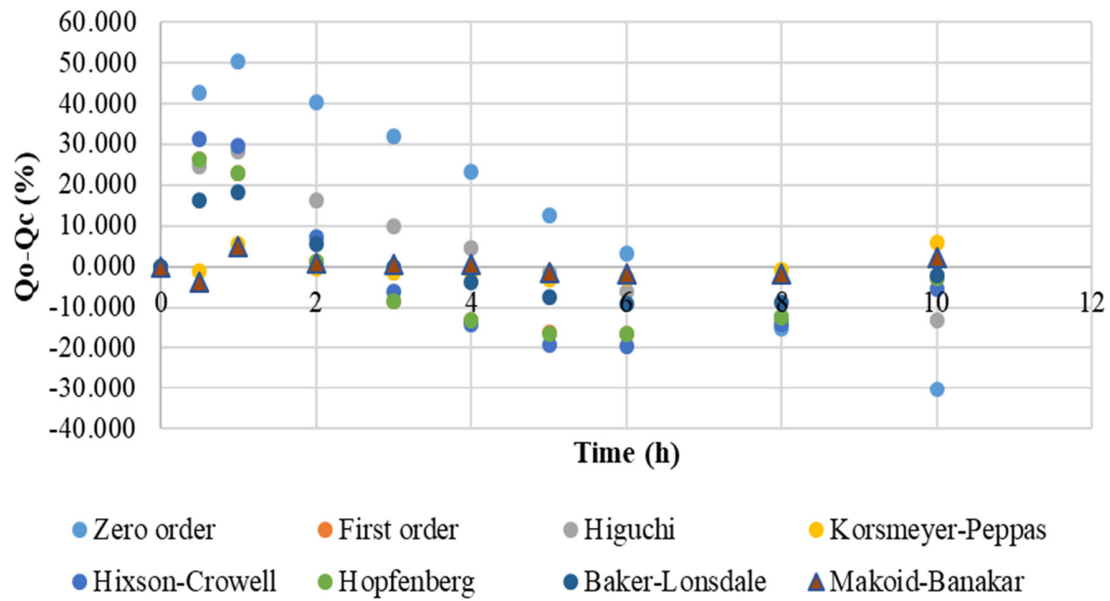**F4**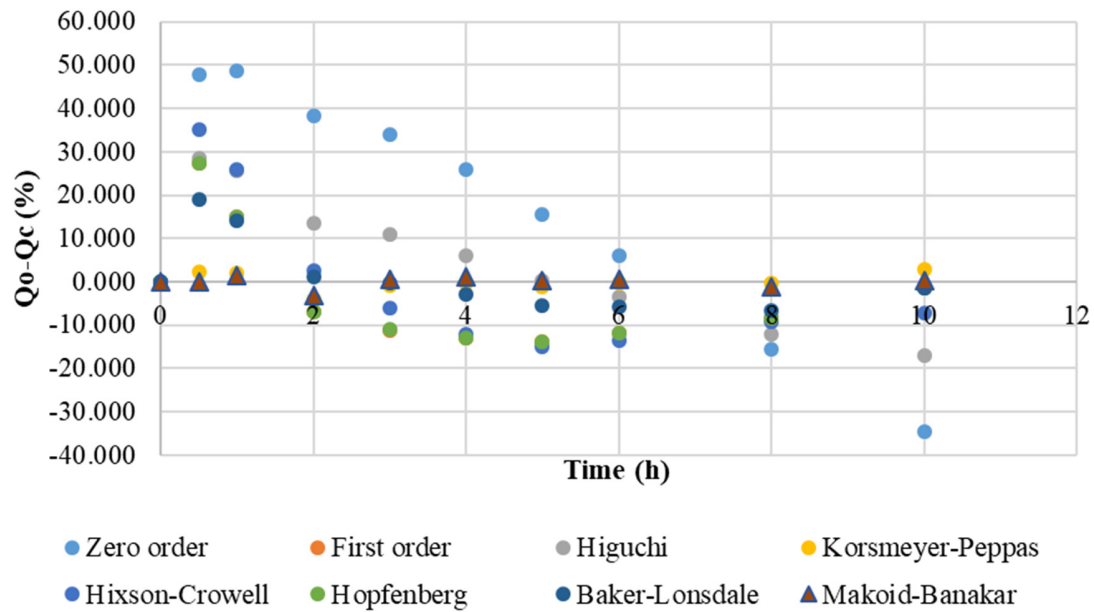

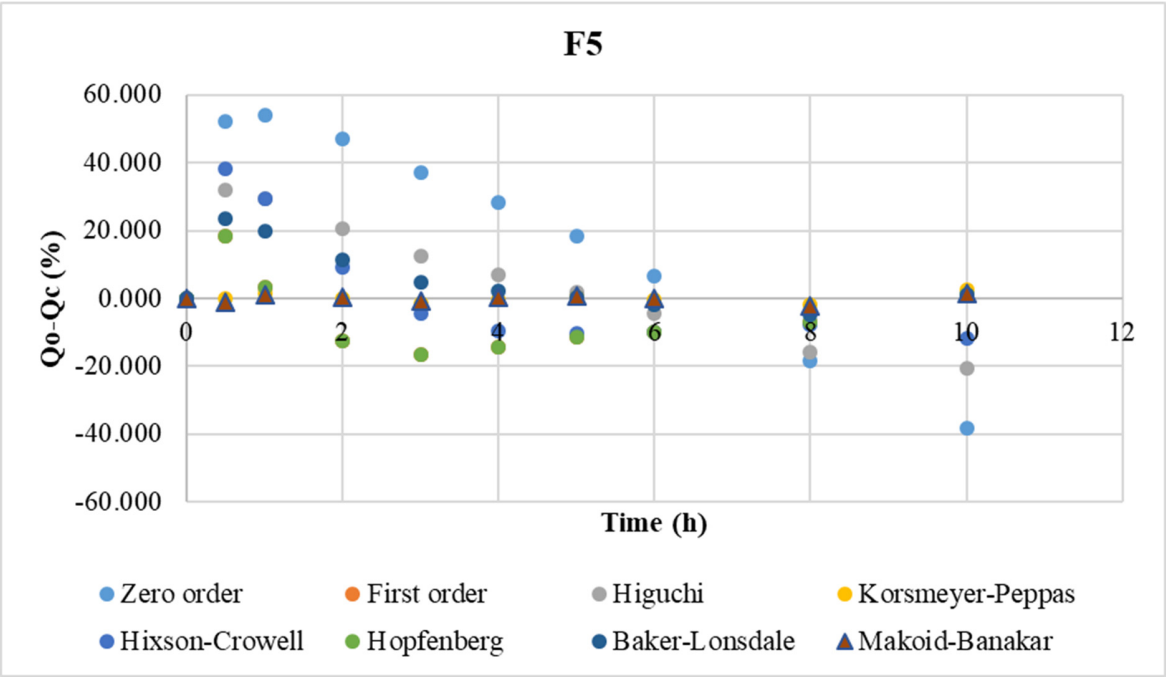

Supplement: s1 [file s1]
